# Supplementary material
Source: ML conference proceedings conference paper supplement (https://openreview.net/forum?id=dCGQlVRa2B)

MSE vs Iteration Count

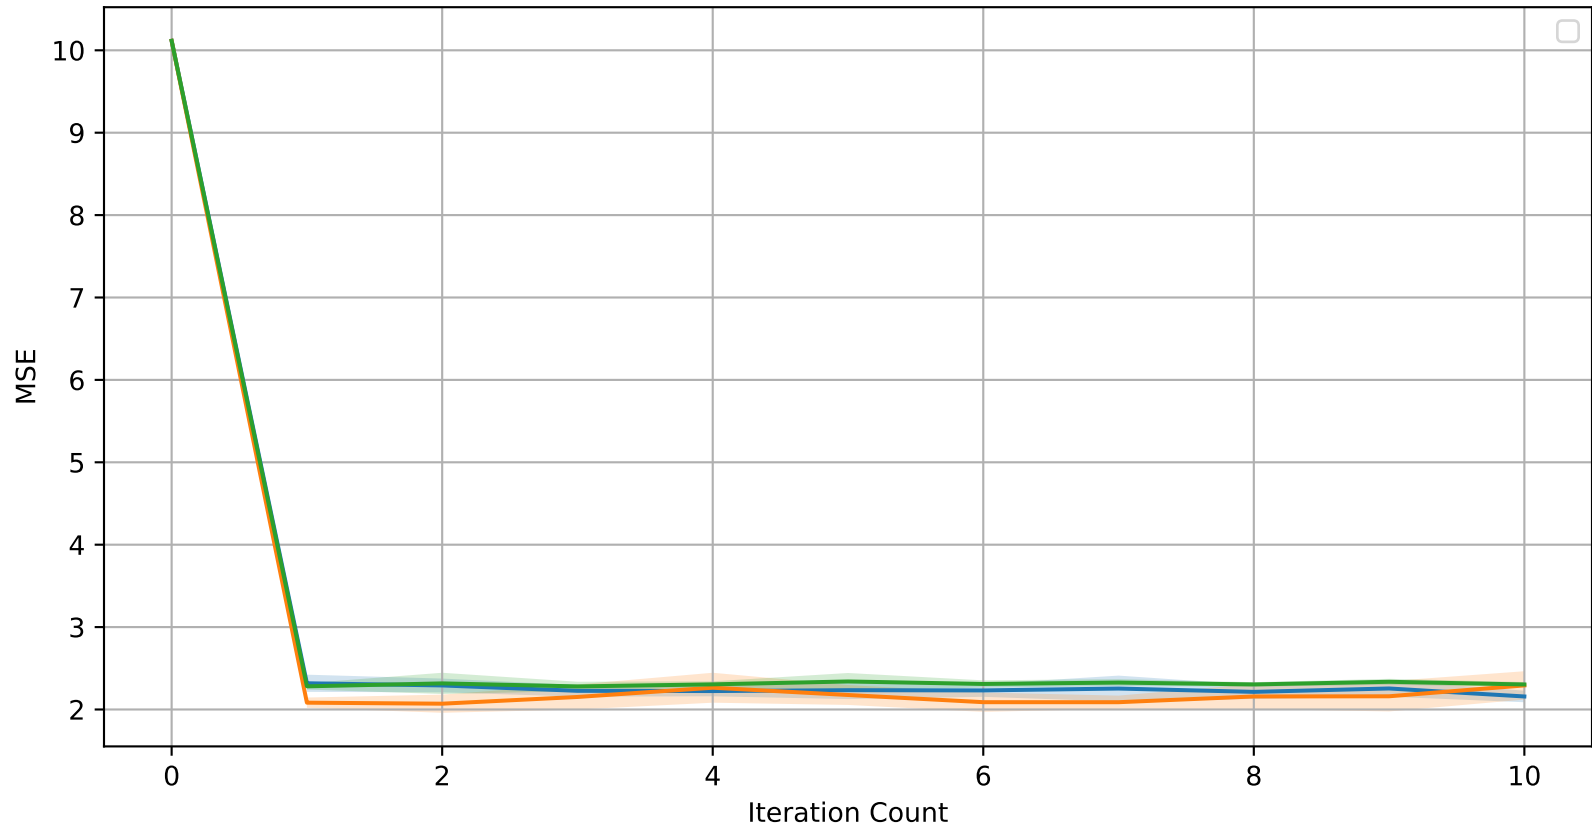

Supplement: supplementary_material [file mse_vs_iteration_count.pdf › Supplementary Material/repre_NLSY/NLSY/plots/mse_vs_iteration_count.pdf]

MSE vs Time

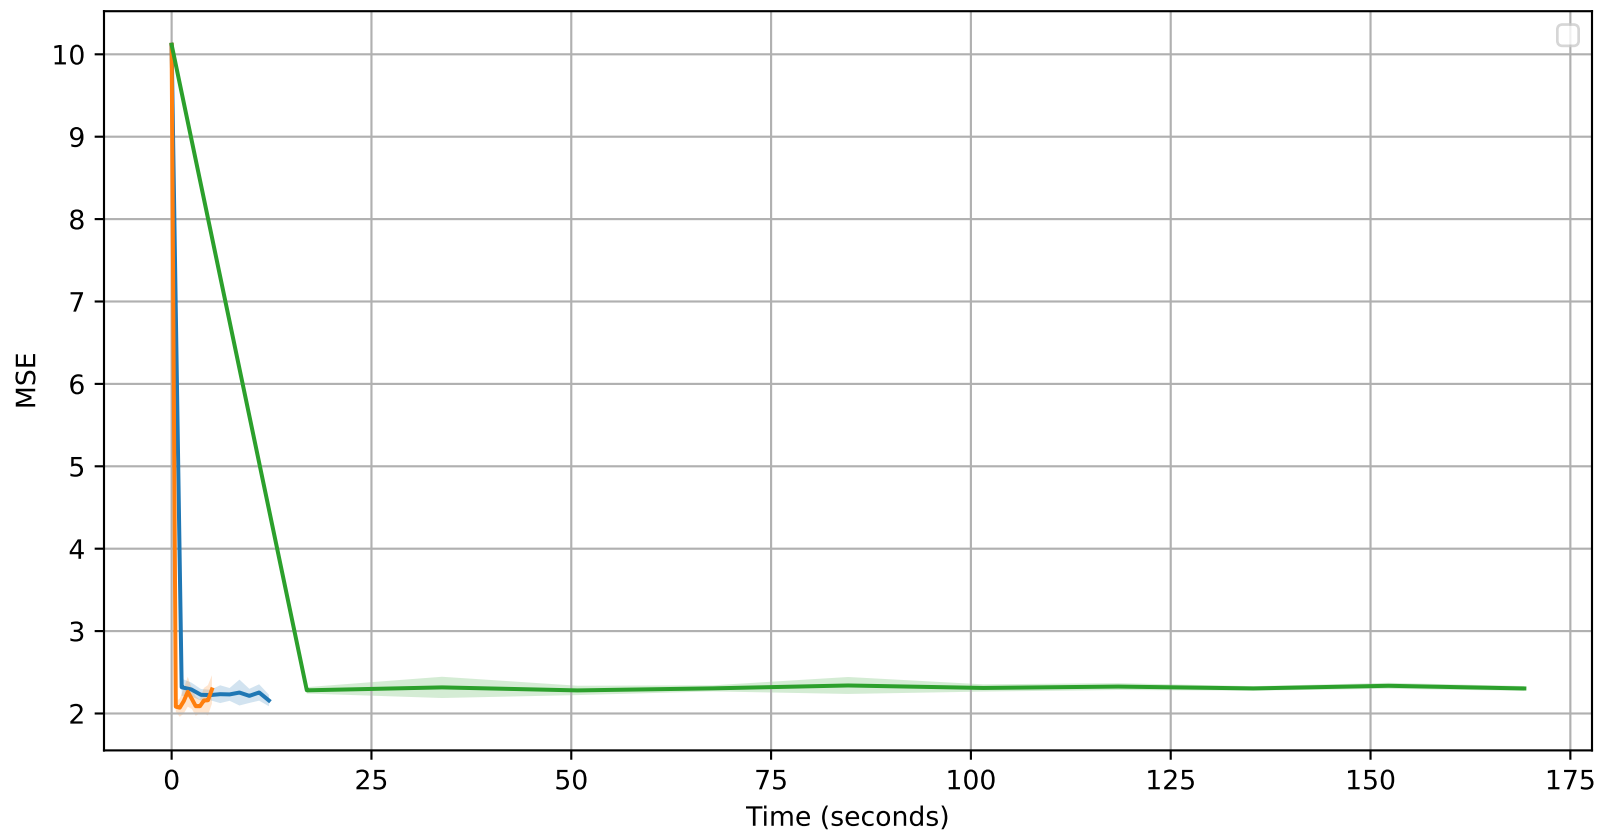

Supplement: supplementary_material [file mse_vs_time.pdf › Supplementary Material/repre_NLSY/NLSY/plots/mse_vs_time.pdf]
